# Supplementary material
Source: MDPI journal article supplement (https://www.mdpi.com/2073-4395/9/4/203)
Supplement: s1 [file s1]

## Supplementary materials

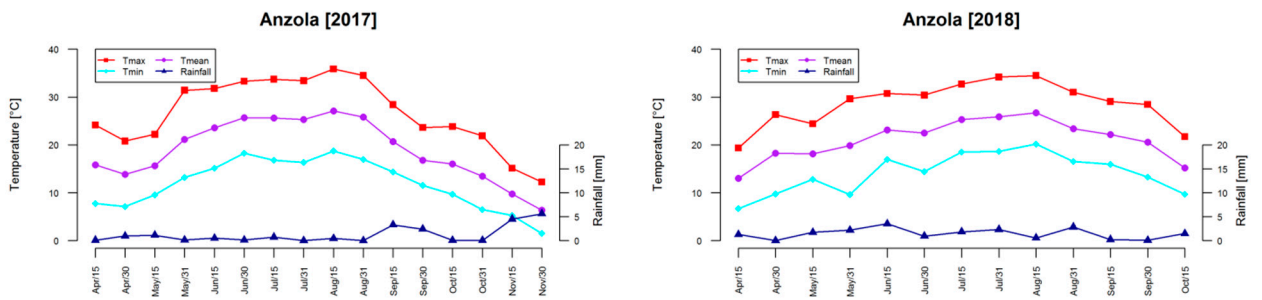

**Figure S1.** Fifteen-day averaged temperatures and rainfall in Anzola dell’Emilia in 2017 and 2018 cropping seasons.

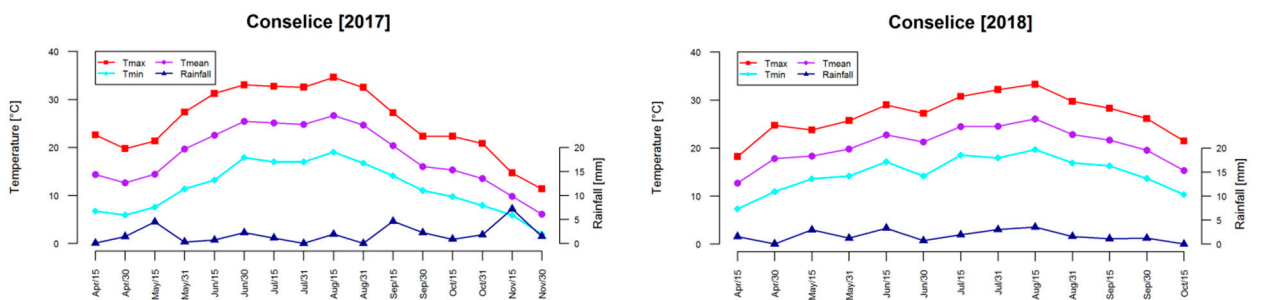

**Figure S2.** Fifteen-day averaged temperatures and rainfall in Conselice in 2017 and 2018 cropping seasons.

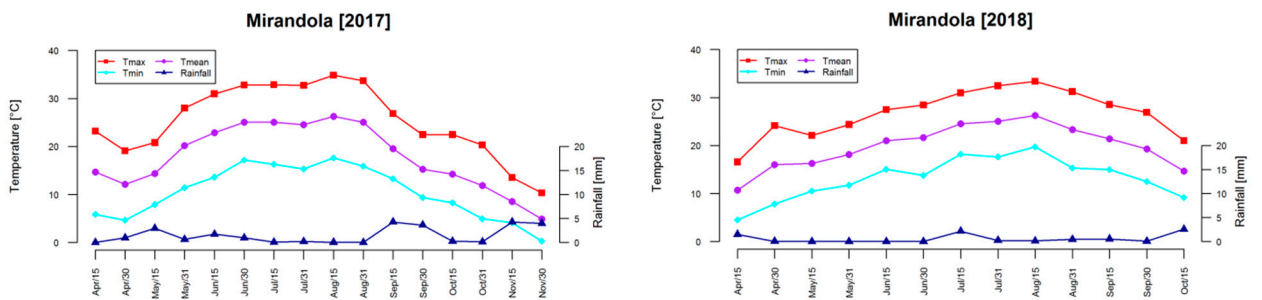

**Figure S3.** Fifteen-day averaged temperatures and rainfall in Mirandola in 2017 and 2018 cropping seasons.

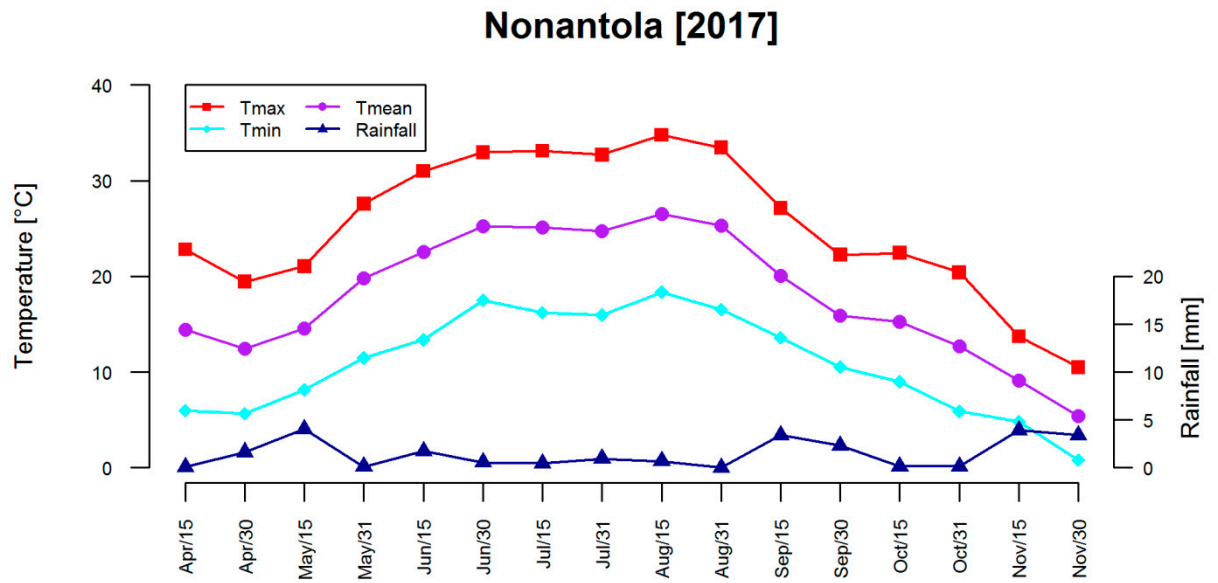

**Figure S4.** Fifteen-day averaged temperatures and rainfall in Nonantola in 2017 cropping season.
